# Supplementary material for: Diet, lifestyle and telomere length: using Copula Graphical Models on NHANES data
Source: publisher site journal article supplement (doi:10.18632/aging.206194), 2025-01-29
Supplement: Supplementary file [file aging-v17-206194-supplementary-material-SD1.pdf]

## SUPPLEMENTARY TABLES

**Supplementary Table 1. Young. Demographic, examination and lifestyle characteristics of the Young group, stratified by telomere length quartiles.<sup>1</sup>**

|                                                | Q1                | Q2                | Q3                | Q4                |
|------------------------------------------------|-------------------|-------------------|-------------------|-------------------|
| <i>n</i>                                       | 656               | 656               | 656               | 655               |
| <b>Telomere length (T/S ratio)</b>             | 0.85 (0.08)       | 1.04 (0.04)       | 1.19 (0.05)       | 1.45 (0.15)       |
| <b>NHANES cycle (%)</b>                        |                   |                   |                   |                   |
| 1999-2000                                      | 367 (55.9)        | 287 (43.8)        | 267 (40.7)        | 272 (41.5)        |
| 2001-2002                                      | 289 (44.1)        | 369 (56.2)        | 389 (59.3)        | 383 (58.5)        |
| <b>Sex (%)</b>                                 |                   |                   |                   |                   |
| Female                                         | 361 (55.0)        | 395 (60.2)        | 369 (56.2)        | 372 (56.8)        |
| Male                                           | 295 (45.0)        | 261 (39.8)        | 287 (43.8)        | 283 (43.2)        |
| <b>Age (years)</b>                             | 30 (6)            | 30 (6)            | 29 (6)            | 28 (6)            |
| <b>Race (%)</b>                                |                   |                   |                   |                   |
| Mexican American                               | 214 (32.6)        | 189 (28.8)        | 179 (27.3)        | 139 (21.2)        |
| Other Hispanic                                 | 41 (6.2)          | 42 (6.4)          | 36 (5.5)          | 61 (9.3)          |
| White                                          | 288 (43.9)        | 308 (47.0)        | 292 (44.5)        | 286 (43.7)        |
| Black                                          | 90 (13.7)         | 89 (13.6)         | 120 (18.3)        | 143 (21.8)        |
| Other                                          | 23 (3.5)          | 28 (4.3)          | 29 (4.4)          | 26 (4.0)          |
| <b>Education level (%)</b>                     |                   |                   |                   |                   |
| Less Than 9th Grade                            | 71 (10.9)         | 50 (7.6)          | 67 (10.2)         | 53 (8.1)          |
| 9-11th Grade                                   | 142 (21.7)        | 103 (15.7)        | 130 (19.8)        | 111 (17.0)        |
| High School Graduate                           | 160 (24.5)        | 160 (24.4)        | 150 (22.9)        | 179 (27.4)        |
| Some College or AA degree                      | 173 (26.5)        | 203 (31.0)        | 185 (28.2)        | 199 (30.4)        |
| College Graduate or above                      | 108 (16.5)        | 139 (21.2)        | 123 (18.8)        | 112 (17.1)        |
| <b>Marital status (%)</b>                      |                   |                   |                   |                   |
| Lives alone                                    | 197 (31.3)        | 246 (39.2)        | 265 (42.7)        | 272 (44.7)        |
| Lives with a partner                           | 432 (68.7)        | 382 (60.8)        | 356 (57.3)        | 336 (55.3)        |
| <b>PIR</b>                                     | 2.07 [1.08, 3.72] | 2.36 [1.24, 3.99] | 2.13 [1.09, 3.94] | 2.04 [0.99, 3.82] |
| <b>Height (cm)</b>                             | 167.8 (10.4)      | 167.4 (9.6)       | 167.8 (10.1)      | 168.0 (9.8)       |
| <b>BMI (kg/m<sup>2</sup>)</b>                  | 28.24 (6.52)      | 28.16 (6.19)      | 27.44 (6.23)      | 27.36 (6.41)      |
| <b>Waist circumference (cm)</b>                | 94.8 (16.3)       | 94.1 (15.0)       | 93.1 (16.0)       | 91.8 (14.8)       |
| <b>Systolic blood pressure (mmHg)</b>          | 114 (12)          | 114 (12)          | 113 (12)          | 113 (12)          |
| <b>Diastolic blood pressure (mmHg)</b>         | 69 (13)           | 70 (12)           | 68 (12)           | 68 (13)           |
| <b>Active smoking ((cigarettes/day)*years)</b> | 0 [0, 0]          | 0 [0, 0]          | 0 [0, 0]          | 0 [0, 0]          |
| <b>Passive smoking (cigarettes/day)</b>        | 0 [0, 0]          | 0 [0, 0]          | 0 [0, 0]          | 0 [0, 0]          |
| <b>PA level (%)</b>                            |                   |                   |                   |                   |
| 1                                              | 151 (23.0)        | 153 (23.3)        | 137 (20.9)        | 123 (18.8)        |
| 2                                              | 337 (51.4)        | 312 (47.6)        | 325 (49.5)        | 335 (51.1)        |
| 3                                              | 99 (15.1)         | 140 (21.3)        | 128 (19.5)        | 140 (21.4)        |
| 4                                              | 69 (10.5)         | 51 (7.8)          | 66 (10.1)         | 57 (8.7)          |
| <b>PA MET (MET*minutes*frequency)</b>          | 72 [0, 432]       | 107 [0, 513]      | 123 [0, 650]      | 114 [0, 552]      |

Abbreviations: MET, metabolic equivalent of task; PA, physical activity; PIR, poverty to income ratio; Q, quartile.

<sup>1</sup>Continuous variables are expressed as mean (SD) or median [Q1, Q3]. Categorical variables are expressed as counts (%). In the left column, in parenthesis, the units of measure are reported; this does not apply to pure numbers.

**Supplementary Table 1. Middle. Demographic, examination and lifestyle characteristics of the Middle group, stratified by telomere length quartiles.<sup>1</sup>**

|                                                | Q1                | Q2                | Q3                | Q4                |
|------------------------------------------------|-------------------|-------------------|-------------------|-------------------|
| <i>n</i>                                       | 553               | 553               | 552               | 552               |
| <b>Telomere length (T/S ratio)</b>             | 0.76 (0.08)       | 0.93 (0.04)       | 1.07 (0.04)       | 1.34 (0.15)       |
| <b>NHANES cycle (%)</b>                        |                   |                   |                   |                   |
| 1999-2000                                      | 300 (54.2)        | 228 (41.2)        | 214 (38.8)        | 210 (38.0)        |
| 2001-2002                                      | 253 (45.8)        | 325 (58.8)        | 338 (61.2)        | 342 (62.0)        |
| <b>Sex (%)</b>                                 |                   |                   |                   |                   |
| Female                                         | 244 (44.1)        | 268 (48.5)        | 285 (51.6)        | 280 (50.7)        |
| Male                                           | 309 (55.9)        | 285 (51.5)        | 267 (48.4)        | 272 (49.3)        |
| <b>Age (years)</b>                             | 50 (6)            | 49 (6)            | 48 (6)            | 47 (5)            |
| <b>Race (%)</b>                                |                   |                   |                   |                   |
| Mexican American                               | 154 (27.8)        | 143 (25.9)        | 136 (24.6)        | 81 (14.7)         |
| Other Hispanic                                 | 25 (4.5)          | 26 (4.7)          | 34 (6.2)          | 27 (4.9)          |
| White                                          | 282 (51.0)        | 283 (51.2)        | 270 (48.9)        | 277 (50.2)        |
| Black                                          | 81 (14.6)         | 83 (15.0)         | 91 (16.5)         | 155 (28.1)        |
| Other                                          | 11 (2.0)          | 18 (3.3)          | 21 (3.8)          | 12 (2.2)          |
| <b>Education level (%)</b>                     |                   |                   |                   |                   |
| Less Than 9th Grade                            | 87 (15.7)         | 77 (13.9)         | 63 (11.4)         | 48 (8.7)          |
| 9-11th Grade                                   | 86 (15.6)         | 80 (14.5)         | 115 (20.8)        | 82 (14.9)         |
| High School Graduate                           | 123 (22.2)        | 116 (21.0)        | 115 (20.8)        | 115 (20.8)        |
| Some College or AA degree                      | 151 (27.3)        | 161 (29.2)        | 119 (21.6)        | 164 (29.7)        |
| College Graduate or above                      | 106 (19.2)        | 118 (21.4)        | 140 (25.4)        | 143 (25.9)        |
| <b>Marital status (%)</b>                      |                   |                   |                   |                   |
| Lives alone                                    | 152 (28.4)        | 155 (29.1)        | 140 (26.9)        | 167 (32.9)        |
| Lives with a partner                           | 384 (71.6)        | 378 (70.9)        | 380 (73.1)        | 341 (67.1)        |
| <b>PIR</b>                                     | 3.16 [1.40, 5.00] | 3.16 [1.48, 5.00] | 2.99 [1.36, 5.00] | 3.23 [1.69, 5.00] |
| <b>Height (cm)</b>                             | 169.0 (9.9)       | 168.6 (10.0)      | 168.2 (10.5)      | 169.1 (9.8)       |
| <b>BMI (kg/m<sup>2</sup>)</b>                  | 29.69 (6.97)      | 29.28 (6.88)      | 29.03 (6.32)      | 28.75 (6.44)      |
| <b>Waist circumference (cm)</b>                | 100.0 (15.9)      | 98.9 (15.4)       | 97.9 (15.0)       | 97.1 (15.1)       |
| <b>Systolic blood pressure (mmHg)</b>          | 126 (17)          | 123 (17)          | 123 (18)          | 124 (17)          |
| <b>Diastolic blood pressure (mmHg)</b>         | 77 (12)           | 76 (11)           | 76 (12)           | 77 (10)           |
| <b>Active smoking ((cigarettes/day)*years)</b> | 0 [0, 0]          | 0 [0, 0]          | 0 [0, 0]          | 0 [0, 0]          |
| <b>Passive smoking (cigarettes/day)</b>        | 0 [0, 0]          | 0 [0, 0]          | 0 [0, 0]          | 0 [0, 0]          |
| <b>PA level (%)</b>                            |                   |                   |                   |                   |
| 1                                              | 148 (26.8)        | 122 (22.1)        | 129 (23.4)        | 132 (24.0)        |
| 2                                              | 270 (48.8)        | 288 (52.1)        | 295 (53.4)        | 295 (53.5)        |
| 3                                              | 95 (17.2)         | 96 (17.4)         | 87 (15.8)         | 82 (14.9)         |
| 4                                              | 40 (7.2)          | 47 (8.5)          | 41 (7.4)          | 42 (7.6)          |
| <b>PA MET (MET*minutes*frequency)</b>          | 40 [0, 408]       | 80 [0, 437]       | 60 [0, 481]       | 108 [0, 469]      |

Abbreviations: MET, metabolic equivalent of task; PA, physical activity; PIR, poverty to income ratio; Q, quartile.

<sup>1</sup>Continuous variables are expressed as mean (SD) or median [Q1, Q3]. Categorical variables are expressed as counts (%). In the left column, in parenthesis, the units of measure are reported; this does not apply to pure numbers.

**Supplementary Table 1. Old. Demographic, examination and lifestyle characteristics of the Old group, stratified by telomere length quartiles.<sup>1</sup>**

|                                                | Q1                | Q2                | Q3                | Q4                |
|------------------------------------------------|-------------------|-------------------|-------------------|-------------------|
| <i>n</i>                                       | 566               | 566               | 566               | 565               |
| <b>Telomere length (T/S ratio)</b>             | 0.67 (0.06)       | 0.82 (0.03)       | 0.95 (0.04)       | 1.19 (0.16)       |
| <b>NHANES cycle (%)</b>                        |                   |                   |                   |                   |
| 1999-2000                                      | 325 (57.4)        | 252 (44.5)        | 249 (44.0)        | 277 (49.0)        |
| 2001-2002                                      | 241 (42.6)        | 314 (55.5)        | 317 (56.0)        | 288 (51.0)        |
| <b>Sex (%)</b>                                 |                   |                   |                   |                   |
| Female                                         | 245 (43.3)        | 266 (47.0)        | 287 (50.7)        | 326 (57.7)        |
| Male                                           | 321 (56.7)        | 300 (53.0)        | 279 (49.3)        | 239 (42.3)        |
| <b>Age (years)</b>                             | 72 (7)            | 71 (7)            | 70 (7)            | 68 (6)            |
| <b>Race (%)</b>                                |                   |                   |                   |                   |
| Mexican American                               | 144 (25.4)        | 112 (19.8)        | 125 (22.1)        | 112 (19.8)        |
| Other Hispanic                                 | 21 (3.7)          | 22 (3.9)          | 20 (3.5)          | 23 (4.1)          |
| White                                          | 329 (58.1)        | 341 (60.2)        | 319 (56.4)        | 322 (57.0)        |
| Black                                          | 64 (11.3)         | 75 (13.3)         | 87 (15.4)         | 99 (17.5)         |
| Other                                          | 8 (1.4)           | 16 (2.8)          | 15 (2.7)          | 9 (1.6)           |
| <b>Education level (%)</b>                     |                   |                   |                   |                   |
| Less Than 9th Grade                            | 158 (27.9)        | 140 (24.8)        | 129 (22.8)        | 122 (21.6)        |
| 9-11th Grade                                   | 102 (18.0)        | 101 (17.9)        | 98 (17.3)         | 89 (15.8)         |
| High School Graduate                           | 126 (22.3)        | 128 (22.7)        | 131 (23.2)        | 152 (26.9)        |
| Some College or AA degree                      | 108 (19.1)        | 103 (18.2)        | 111 (19.6)        | 113 (20.0)        |
| College Graduate or above                      | 72 (12.7)         | 93 (16.5)         | 96 (17.0)         | 89 (15.8)         |
| <b>Marital status (%)</b>                      |                   |                   |                   |                   |
| Lives alone                                    | 198 (35.8)        | 186 (34.0)        | 187 (34.6)        | 180 (34.4)        |
| Lives with a partner                           | 355 (64.2)        | 361 (66.0)        | 354 (65.4)        | 344 (65.6)        |
| <b>PIR</b>                                     | 1.97 [1.19, 3.39] | 2.22 [1.21, 3.83] | 2.25 [1.24, 4.07] | 2.58 [1.35, 4.42] |
| <b>Height (cm)</b>                             | 165.9 (9.6)       | 166.0 (9.9)       | 165.4 (10.1)      | 165.3 (10.0)      |
| <b>BMI (kg/m<sup>2</sup>)</b>                  | 28.08 (5.12)      | 28.52 (5.43)      | 28.37 (5.40)      | 28.81 (5.69)      |
| <b>Waist circumference (cm)</b>                | 100.5 (13.6)      | 101.0 (13.7)      | 100.0 (13.1)      | 99.9 (13.7)       |
| <b>Systolic blood pressure (mmHg)</b>          | 141 (23)          | 138 (22)          | 138 (22)          | 141 (21)          |
| <b>Diastolic blood pressure (mmHg)</b>         | 69 (17)           | 68 (16)           | 70 (16)           | 71 (15)           |
| <b>Active smoking ((cigarettes/day)*years)</b> | 0 [0, 0]          | 0 [0, 0]          | 0 [0, 0]          | 0 [0, 0]          |
| <b>Passive smoking (cigarettes/day)</b>        | 0 [0, 0]          | 0 [0, 0]          | 0 [0, 0]          | 0 [0, 0]          |
| <b>PA level (%)</b>                            |                   |                   |                   |                   |
| 1                                              | 172 (30.4)        | 149 (26.4)        | 147 (26.0)        | 144 (25.6)        |
| 2                                              | 327 (57.9)        | 336 (59.5)        | 312 (55.2)        | 334 (59.4)        |
| 3                                              | 56 (9.9)          | 60 (10.6)         | 87 (15.4)         | 73 (13.0)         |
| 4                                              | 10 (1.8)          | 20 (3.5)          | 19 (3.4)          | 11 (2.0)          |
| <b>PA MET (MET*minutes*frequency)</b>          | 0 [0, 303]        | 0 [0, 295]        | 0 [0, 359]        | 0 [0, 397]        |

Abbreviations: MET, metabolic equivalent of task; PA, physical activity; PIR, poverty to income ratio; Q, quartile.

<sup>1</sup>Continuous variables are expressed as mean (SD) or median [Q1, Q3]. Categorical variables are expressed as counts (%). In the left column, in parenthesis, the units of measure are reported; this does not apply to pure numbers.

**Supplementary Table 2. Young. Laboratory variables of the Young group, stratified by telomere length quartiles.<sup>1</sup>**

|                                    | Q1                     | Q2                    | Q3                    | Q4                    |
|------------------------------------|------------------------|-----------------------|-----------------------|-----------------------|
| <i>n</i>                           | 656                    | 656                   | 656                   | 655                   |
| <b>Telomere length (T/S ratio)</b> | 0.85 (0.08)            | 1.04 (0.04)           | 1.19 (0.05)           | 1.45 (0.15)           |
| <b>Total cholesterol (mg/dL)</b>   | 197 (44)               | 197 (42)              | 194 (42)              | 192 (42)              |
| <b>HDL (mg/dL)</b>                 | 50 (15)                | 51 (15)               | 52 (15)               | 52 (15)               |
| <b>C-reactive protein (mg/dL)</b>  | 0.24 [0.08, 0.55]      | 0.22 [0.08, 0.47]     | 0.18 [0.06, 0.47]     | 0.17 [0.06, 0.46]     |
| <b>gHb (%)</b>                     | 5.1 [4.9, 5.3]         | 5.1 [4.9, 5.3]        | 5.1 [5.0, 5.3]        | 5.1 [4.9, 5.3]        |
| <b>Leukocyte count (SI)</b>        | 7.7 (2.3)              | 7.8 (2.3)             | 7.7 (2.3)             | 7.4 (2.3)             |
| <i>Lymphocytes (%)</i>             | 29.1 (8.3)             | 28.8 (8.5)            | 29.3 (8.5)            | 29.7 (8.8)            |
| <i>Monocytes (%)</i>               | 7.8 (2.0)              | 7.7 (2.1)             | 7.7 (2.3)             | 7.9 (2.4)             |
| <i>Neutrophils (%)</i>             | 60.0 (9.8)             | 60.4 (10.0)           | 59.9 (9.9)            | 59.3 (10.1)           |
| <i>Eosinophils (%)</i>             | 2.0 [1.3, 3.2]         | 2.0 [1.2, 3.1]        | 2.0 [1.2, 3.2]        | 2.0 [1.3, 3.3]        |
| <i>Basophils (%)</i>               | 0.6 [0.4, 0.7]         | 0.6 [0.4, 0.8]        | 0.6 [0.4, 0.8]        | 0.6 [0.4, 0.8]        |
| <b>Erythrocyte count (SI)</b>      | 4.69 (0.57)            | 4.67 (0.56)           | 4.69 (0.56)           | 4.70 (0.59)           |
| <b>Hb (g/dL)</b>                   | 14.2 (1.7)             | 14.1 (1.7)            | 14.2 (1.7)            | 14.1 (1.7)            |
| <b>Hematocrit (%)</b>              | 41.8 (4.9)             | 41.6 (4.9)            | 41.7 (4.9)            | 41.7 (5.1)            |
| <b>Platelet count (SI)</b>         | 273 (66)               | 271 (64)              | 270 (64)              | 271 (67)              |
| <b>Iron (µg/dL)</b>                | 142 (91)               | 138 (116)             | 127 (80)              | 128 (102)             |
| <b>TIBC (µg/dL)</b>                | 118 (33)               | 114 (33)              | 116 (36)              | 119 (38)              |
| <b>Transferrin saturation (%)</b>  | 93.2 (14.3)            | 95.4 (35.5)           | 93.8 (28.8)           | 92.8 (23.9)           |
| <b>Ferritin (ng/mL)</b>            | 62 [25, 133]           | 59 [21, 125]          | 53 [22, 124]          | 54 [24, 121]          |
| <b>Folate (ng/mL)</b>              | 11.4 [8.4, 16.6]       | 11.3 [8.4, 16.0]      | 11.1 [8.3, 15.6]      | 11.4 [8.1, 16.5]      |
| <b>Cobalamin (pg/mL)</b>           | 434 [331, 565]         | 441 [340, 564]        | 444 [334, 562]        | 437 [339, 590]        |
| <b>Homocysteine (µmol/L)</b>       | 6.66 [5.23, 8.10]      | 6.58 [5.24, 7.90]     | 6.72 [5.28, 8.14]     | 6.53 [5.29, 8.15]     |
| <b>Methylmalonic acid (µmol/L)</b> | 0.11 [0.09, 0.15]      | 0.11 [0.09, 0.14]     | 0.11 [0.09, 0.15]     | 0.11 [0.09, 0.15]     |
| <b>Cotinine (ng/mL)</b>            | 0.13 [0.04, 38.43]     | 0.12 [0.04, 21.00]    | 0.12 [0.04, 29.31]    | 0.18 [0.04, 65.66]    |
| <b>γ-tocopherol (µg/dL)</b>        | 222.2 [158.1, 295.3]   | 225.9 [165.9, 300.2]  | 212.0 [150.3, 284.0]  | 215.0 [150.6, 282.6]  |
| <b>Retinyl palmitate (µg/dL)</b>   | 1.70 [1.10, 2.80]      | 1.80 [1.10, 2.90]     | 1.80 [1.10, 2.80]     | 1.80 [1.10, 2.81]     |
| <b>Retinyl stearate (µg/dL)</b>    | 0.35 [0.35, 0.35]      | 0.35 [0.35, 0.35]     | 0.35 [0.35, 0.35]     | 0.35 [0.35, 0.35]     |
| <b>Vitamin A (µg/dL)</b>           | 53.2 (16.0)            | 52.2 (14.5)           | 51.9 (14.8)           | 52.6 (15.5)           |
| <b>Vitamin E (µg/dL)</b>           | 1031.6 [819.1, 1275.6] | 996.7 [853.9, 1255.8] | 970.9 [806.8, 1219.3] | 945.7 [796.3, 1166.8] |
| <b>Triglycerides (mg/dL)</b>       | 114 [78, 182]          | 111 [72, 162]         | 104 [72, 155]         | 99 [70, 167]          |
| <b>LDL (mg/dL)</b>                 | 119 (33)               | 114 (33)              | 116 (36)              | 119 (38)              |
| <b>Glucose (mg/dL)</b>             | 92.2 [86.3, 98.4]      | 91.1 [84.9, 98.9]     | 89.8 [84.1, 96.2]     | 90.0 [85.6, 96.7]     |
| <b>C-peptide (nmol/L)</b>          | 0.71 [0.51, 0.94]      | 0.66 [0.48, 0.90]     | 0.63 [0.46, 0.88]     | 0.63 [0.49, 0.82]     |
| <b>Insulin (µU/mL)</b>             | 9.80 [6.94, 15.48]     | 10.10 [6.85, 14.35]   | 9.16 [6.77, 14.21]    | 9.36 [6.79, 13.54]    |

Abbreviations: gHb, glycated hemoglobin; Hb, hemoglobin; Q, quartile; TIBC, total iron binding capacity.

<sup>1</sup>The variables are all continuous, and they are expressed as mean (SD) or median [Q1, Q3]. In the left column, in parenthesis, the units of measure are reported.

**Supplementary Table 2. Middle. Laboratory variables of the Middle group, stratified by telomere length quartiles.<sup>1</sup>**

|                                    | Q1                     | Q2                      | Q3                      | Q4                     |
|------------------------------------|------------------------|-------------------------|-------------------------|------------------------|
| <i>n</i>                           | 553                    | 553                     | 552                     | 552                    |
| <b>Telomere length (T/S ratio)</b> | 0.76 (0.08)            | 0.93 (0.04)             | 1.07 (0.04)             | 1.34 (0.15)            |
| <b>Total cholesterol (mg/dL)</b>   | 211 (45)               | 209 (38)                | 211 (42)                | 210 (41)               |
| <b>HDL (mg/dL)</b>                 | 51 (15)                | 50 (15)                 | 51 (15)                 | 52 (16)                |
| <b>C-reactive protein (mg/dL)</b>  | 0.26 [0.12, 0.60]      | 0.23 [0.10, 0.50]       | 0.25 [0.10, 0.54]       | 0.20 [0.08, 0.47]      |
| <b>gHb (%)</b>                     | 5.4 [5.2, 5.7]         | 5.4 [5.2, 5.6]          | 5.4 [5.1, 5.6]          | 5.4 [5.1, 5.7]         |
| <b>Leukocyte count (SI)</b>        | 7.2 (2.4)              | 7.1 (2.1)               | 7.2 (2.0)               | 6.9 (2.0)              |
| <i>Lymphocytes (%)</i>             | 31.2 (8.6)             | 30.5 (7.9)              | 30.8 (7.9)              | 31.7 (8.5)             |
| <i>Monocytes (%)</i>               | 8.2 (2.1)              | 8.0 (2.1)               | 7.9 (2.1)               | 8.0 (2.1)              |
| <i>Neutrophils (%)</i>             | 57.2 (9.4)             | 58.1 (8.7)              | 57.8 (8.7)              | 56.9 (9.4)             |
| <i>Eosinophils (%)</i>             | 2.3 [1.6, 3.4]         | 2.3 [1.5, 3.5]          | 2.3 [1.6, 3.5]          | 2.3 [1.5, 3.5]         |
| <i>Basophils (%)</i>               | 0.6 [0.4, 0.9]         | 0.6 [0.4, 0.9]          | 0.6 [0.4, 0.9]          | 0.6 [0.4, 0.9]         |
| <b>Erythrocyte count (SI)</b>      | 4.78 (0.49)            | 4.75 (0.45)             | 4.71 (0.48)             | 4.71 (0.52)            |
| <b>Hb (g/dL)</b>                   | 14.6 (1.6)             | 14.5 (1.5)              | 14.4 (1.5)              | 14.2 (1.5)             |
| <b>Hematocrit (%)</b>              | 43.1 (4.5)             | 42.6 (4.2)              | 42.4 (4.2)              | 42.0 (4.4)             |
| <b>Platelet count (SI)</b>         | 268 (70)               | 276 (69)                | 271 (67)                | 274 (67)               |
| <b>Iron (µg/dL)</b>                | 157 (115)              | 162 (117)               | 192 (283)               | 148 (144)              |
| <b>TIBC (µg/dL)</b>                | 129 (34)               | 130 (34)                | 127 (34)                | 128 (35)               |
| <b>Transferrin saturation (%)</b>  | 106.4 (33.8)           | 107.5 (32.7)            | 107.0 (39.6)            | 99.9 (20.6)            |
| <b>Ferritin (ng/mL)</b>            | 107 [46, 206]          | 93 [44, 196]            | 94 [40, 174]            | 94 [36, 205]           |
| <b>Folate (ng/mL)</b>              | 12.1 [8.7, 16.6]       | 12.0 [8.7, 16.4]        | 12.2 [8.9, 16.6]        | 12.7 [9.2, 17.7]       |
| <b>Cobalamin (pg/mL)</b>           | 463 [362, 608]         | 459 [350, 617]          | 460 [352, 614]          | 484 [373, 627]         |
| <b>Homocysteine (µmol/L)</b>       | 7.82 [6.64, 9.69]      | 7.96 [6.70, 9.48]       | 7.78 [6.28, 9.56]       | 7.77 [6.47, 9.65]      |
| <b>Methylmalonic acid (µmol/L)</b> | 0.12 [0.10, 0.16]      | 0.12 [0.10, 0.16]       | 0.12 [0.10, 0.16]       | 0.12 [0.10, 0.16]      |
| <b>Cotinine (ng/mL)</b>            | 0.10 [0.04, 71.07]     | 0.10 [0.04, 99.68]      | 0.10 [0.04, 76.40]      | 0.11 [0.04, 43.83]     |
| <b>γ-tocopherol (µg/dL)</b>        | 245.0 [164.0, 348.0]   | 230.0 [163.0, 322.0]    | 234.0 [152.0, 312.8]    | 219.5 [137.4, 316.0]   |
| <b>Retinyl palmitate (µg/dL)</b>   | 1.70 [1.00, 2.80]      | 1.80 [1.20, 2.77]       | 1.90 [1.20, 3.00]       | 1.90 [1.10, 3.10]      |
| <b>Retinyl stearate (µg/dL)</b>    | 0.35 [0.35, 0.35]      | 0.35 [0.35, 0.35]       | 0.35 [0.35, 0.35]       | 0.35 [0.35, 0.35]      |
| <b>Vitamin A (µg/dL)</b>           | 59.2 (17.77)           | 60.0 (18.00)            | 60.4 (17.27)            | 60.1 (17.5)            |
| <b>Vitamin E (µg/dL)</b>           | 1203.3 [951.6, 1549.4] | 1230.5 [1009.4, 1496.1] | 1207.1 [1000.0, 1553.7] | 1201.6 [960.6, 1578.6] |
| <b>Triglycerides (mg/dL)</b>       | 132 [87, 187]          | 129 [91, 204]           | 129 [89, 193]           | 114 [77, 169]          |
| <b>LDL (mg/dL)</b>                 | 129 (34)               | 130 (34)                | 127 (34)                | 128 (35)               |
| <b>Glucose (mg/dL)</b>             | 98.4 [91.8, 106.0]     | 98.9 [92.6, 108.1]      | 98.6 [90.7, 107.4]      | 95.6 [89.2, 103.9]     |
| <b>C-peptide (nmol/L)</b>          | 0.78 [0.59, 1.09]      | 0.76 [0.57, 1.08]       | 0.74 [0.55, 1.01]       | 0.65 [0.50, 1.02]      |
| <b>Insulin (µU/mL)</b>             | 11.55 [7.63, 17.04]    | 10.80 [7.43, 16.13]     | 10.19 [7.26, 15.44]     | 9.41 [6.78, 14.77]     |

Abbreviations: gHb, glycated hemoglobin; Hb, hemoglobin; Q, quartile; TIBC, total iron binding capacity.

<sup>1</sup>The variables are all continuous, and they are expressed as mean (SD) or median [Q1, Q3]. In the left column, in parenthesis, the units of measure are reported.

**Supplementary Table 2. Old. Laboratory variables of the Old group, stratified by telomere length quartiles.<sup>1</sup>**

|                                    | Q1                      | Q2                      | Q3                      | Q4                      |
|------------------------------------|-------------------------|-------------------------|-------------------------|-------------------------|
| <i>n</i>                           | 566                     | 566                     | 566                     | 565                     |
| <b>Telomere length (T/S ratio)</b> | 0.67 (0.06)             | 0.82 (0.03)             | 0.95 (0.04)             | 1.19 (0.16)             |
| <b>Total cholesterol (mg/dL)</b>   | 209 (44)                | 209 (39)                | 213 (39)                | 212 (40)                |
| <b>HDL (mg/dL)</b>                 | 51 (16)                 | 53 (16)                 | 53 (16)                 | 54 (17)                 |
| <b>C-reactive protein (mg/dL)</b>  | 0.32 [0.14, 0.62]       | 0.28 [0.14, 0.64]       | 0.28 [0.14, 0.55]       | 0.28 [0.12, 0.59]       |
| <b>gHb (%)</b>                     | 5.6 [5.3, 6.0]          | 5.6 [5.3, 6.1]          | 5.6 [5.3, 6.0]          | 5.6 [5.3, 6.0]          |
| <b>Leukocyte count (SI)</b>        | 6.9 [5.9, 8.3]          | 6.9 [5.9, 8.2]          | 6.9 [5.7, 8.0]          | 6.6 [5.5, 8.0]          |
| <i>Lymphocytes (%)</i>             | 28.9 (9.0)              | 28.2 (8.7)              | 29.0 (8.0)              | 29.3 (9.0)              |
| <i>Monocytes (%)</i>               | 8.7 (2.2)               | 8.5 (2.1)               | 8.3 (2.2)               | 8.5 (2.3)               |
| <i>Neutrophils (%)</i>             | 58.7 (9.7)              | 59.7 (9.2)              | 59.0 (8.7)              | 58.7 (9.8)              |
| <i>Eosinophils (%)</i>             | 2.7 [1.7, 3.8]          | 2.6 [1.7, 3.7]          | 2.3 [1.7, 3.6]          | 2.4 [1.7, 3.6]          |
| <i>Basophils (%)</i>               | 0.6 [0.4, 0.8]          | 0.6 [0.4, 0.8]          | 0.6 [0.4, 0.0]          | 0.6 [0.4, 0.9]          |
| <b>Erythrocyte count (SI)</b>      | 4.60 (0.52)             | 4.60 (0.47)             | 4.67 (0.47)             | 4.61 (0.47)             |
| <b>Hb (g/dL)</b>                   | 14.2 (1.4)              | 14.2 (1.4)              | 14.3 (1.4)              | 14.1 (1.3)              |
| <b>Hematocrit (%)</b>              | 42.1 (4.3)              | 42.1 (4.1)              | 42.2 (4.1)              | 41.8 (4.0)              |
| <b>Platelet count (SI)</b>         | 256 (84)                | 254 (70)                | 259 (73)                | 258 (61)                |
| <b>Iron (µg/dL)</b>                | 172 (118)               | 158 (86)                | 165 (95)                | 151 (80)                |
| <b>TIBC (µg/dL)</b>                | 124 (36)                | 125 (31)                | 133 (37)                | 127 (35)                |
| <b>Transferrin saturation (%)</b>  | 116.4 (42.6)            | 116.3 (43.0)            | 113.4 (46.2)            | 112.9 (34.4)            |
| <b>Ferritin (ng/mL)</b>            | 122 [63, 221]           | 119 [63, 224]           | 100 [55, 183]           | 100 [55, 173]           |
| <b>Folate (ng/mL)</b>              | 15.6 [10.7, 23.4]       | 15.8 [11.1, 22.6]       | 15.0 [10.6, 20.9]       | 16.8 [11.7, 22.7]       |
| <b>Cobalamin (pg/mL)</b>           | 469 [342, 663]          | 465 [345, 634]          | 487 [359, 632]          | 481 [362, 659]          |
| <b>Homocysteine (µmol/L)</b>       | 9.72 [8.08, 11.94]      | 9.57 [7.82, 11.79]      | 9.37 [7.55, 11.41]      | 8.75 [7.27, 11.12]      |
| <b>Methylmalonic acid (µmol/L)</b> | 0.16 [0.12, 0.22]       | 0.16 [0.12, 0.21]       | 0.14 [0.12, 0.20]       | 0.14 [0.11, 0.19]       |
| <b>Cotinine (ng/mL)</b>            | 0.04 [0.04, 0.44]       | 0.04 [0.03, 0.26]       | 0.05 [0.04, 0.46]       | 0.04 [0.04, 0.19]       |
| <b>γ-tocopherol (µg/dL)</b>        | 211.0 [124.9, 322.9]    | 200.7 [120.1, 306.0]    | 189.0 [105.2, 303.4]    | 194.0 [106.7, 298.0]    |
| <b>Retinyl palmitate (µg/dL)</b>   | 1.50 [0.90, 2.70]       | 1.80 [1.10, 2.90]       | 1.80 [1.00, 2.80]       | 1.80 [1.00, 3.10]       |
| <b>Retinyl stearate (µg/dL)</b>    | 0.35 [0.35, 0.35]       | 0.35 [0.35, 0.35]       | 0.35 [0.35, 0.35]       | 0.35 [0.35, 0.35]       |
| <b>Vitamin A (µg/dL)</b>           | 64.6 (21.5)             | 66.1 (20.7)             | 63.8 (17.6)             | 64.4 (17.9)             |
| <b>Vitamin E (µg/dL)</b>           | 1378.3 [1084.9, 1903.2] | 1382.9 [1101.0, 1902.9] | 1417.0 [1080.0, 1980.8] | 1428.5 [1098.3, 1909.4] |
| <b>Triglycerides (mg/dL)</b>       | 145 [103, 201]          | 138 [102, 191]          | 135 [101, 207]          | 132 [95, 190]           |
| <b>LDL (mg/dL)</b>                 | 123 (36)                | 125 (31)                | 132 (37)                | 127 (35)                |
| <b>Glucose (mg/dL)</b>             | 102.8 [94.3, 115.7]     | 103.8 [94.9, 117.7]     | 103.0 [94.6, 114.2]     | 103.2 [94.5, 116.3]     |
| <b>C-peptide (nmol/L)</b>          | 0.88 [0.63, 1.19]       | 0.87 [0.62, 1.20]       | 0.82 [0.62, 1.12]       | 0.86 [0.60, 1.16]       |
| <b>Insulin (µU/mL)</b>             | 11.37 [7.85, 17.00]     | 11.43 [7.61, 18.18]     | 10.77 [7.56, 18.18]     | 11.34 [7.40, 17.59]     |

Abbreviations: gHb, glycated hemoglobin; Hb, hemoglobin; Q, quartile; TIBC, total iron binding capacity.

<sup>1</sup>The variables are all continuous, and they are expressed as mean (SD) or median [Q1, Q3]. In the left column, in parenthesis, the units of measure are reported.
