# Supplementary material for: Diet, lifestyle and telomere length: using Copula Graphical Models on NHANES data
Source: publisher site journal article supplement (doi:10.18632/aging.206194), 2025-01-29
Supplement: Supplementary file [file aging-v17-206194-supplementary-material-SD3.pdf]

**Supplementary Table 4. Characteristics of the whole population after stratification in quartiles of caffeine intake.<sup>1</sup>**

|                                                | Q1                         | Q2                         | Q3                         | Q4                         |
|------------------------------------------------|----------------------------|----------------------------|----------------------------|----------------------------|
| <i>n</i>                                       | 1774                       | 1774                       | 1774                       | 1774                       |
| <b>Telomere length (T/S ratio)</b>             | 1.05 (0.25)                | 1.04 (0.25)                | 1.01 (0.24)                | 1.01 (0.23)                |
| <b>NHANES cycle (%)</b>                        |                            |                            |                            |                            |
| 1999-2000                                      | 784 (44.2)                 | 828 (46.7)                 | 739 (41.7)                 | 897 (50.6)                 |
| 2001-2002                                      | 990 (55.8)                 | 946 (53.3)                 | 1035 (58.3)                | 877 (49.4)                 |
| <b>Sex (%)</b>                                 |                            |                            |                            |                            |
| Female                                         | 726 (40.9)                 | 791 (44.6)                 | 857 (48.3)                 | 1024 (57.7)                |
| Male                                           | 1048 (59.1)                | 983 (55.4)                 | 917 (51.7)                 | 750 (42.3)                 |
| <b>Age (years)</b>                             | 47 (19)                    | 47 (19)                    | 49 (18)                    | 50 (15)                    |
| <b>BMI (kg/m<sup>2</sup>)</b>                  | 28.30 (6.36)               | 28.45 (6.08)               | 28.51 (6.20)               | 28.50 (6.17)               |
| <b>Waist circumference (cm)</b>                | 96.1 (15.2)                | 96.8 (14.7)                | 97.7 (15.4)                | 98.2 (15.4)                |
| <b>Active smoking ((cigarettes/day)*years)</b> | 0 [0, 0]                   | 0 [0, 0]                   | 0 [0, 0]                   | 0 [0, 14]                  |
| <b>Passive smoking (cigarettes/day)</b>        | 0 [0, 0]                   | 0 [0, 0]                   | 0 [0, 0]                   | 0 [0, 3]                   |
| <b>PA level (%)</b>                            |                            |                            |                            |                            |
| 1                                              | 432 (24.4)                 | 403 (22.7)                 | 444 (25.1)                 | 428 (24.2)                 |
| 2                                              | 959 (54.1)                 | 980 (55.3)                 | 932 (52.6)                 | 895 (50.5)                 |
| 3                                              | 286 (16.1)                 | 288 (16.3)                 | 272 (15.3)                 | 297 (16.8)                 |
| 4                                              | 96 (5.4)                   | 101 (5.7)                  | 124 (7.0)                  | 152 (8.6)                  |
| <b>PA MET (MET*minutes*frequency)</b>          | 36 [0, 423]                | 52 [0, 410]                | 54 [0, 433]                | 96 [0, 512]                |
| <b>Total cholesterol (mg/dL)</b>               | 202 (42)                   | 204 (43)                   | 205 (41)                   | 207 (43)                   |
| <b>HDL (mg/dL)</b>                             | 53 (16)                    | 51 (15)                    | 51 (16)                    | 51 (16)                    |
| <b>C-reactive protein (mg/dL)</b>              | 0.25 [0.09, 0.57]          | 0.25 [0.09, 0.57]          | 0.24 [0.09, 0.54]          | 0.22 [0.10, 0.47]          |
| <b>gHb (%)</b>                                 | 5.3 [5.1, 5.6]             | 5.3 [5.1, 5.6]             | 5.4 [5.1, 5.7]             | 5.3 [5.1, 5.6]             |
| <b>Cotinine (ng/mL)</b>                        | 0.06 [0.04, 0.60]          | 0.06 [0.04, 0.77]          | 0.09 [0.04, 33.45]         | 0.19 [0.04, 140.00]        |
| <b>γ-tocopherol (μg/dL)</b>                    | 207.0 [134.5, 288.0]       | 216.0 [145.1, 300.0]       | 224.0 [153.0, 310.9]       | 229.0 [139.6, 320.7]       |
| <b>Vitamin A (μg/dL)</b>                       | 56.9 (18.2)                | 57.5 (18.9)                | 59.2 (18.1)                | 61.1 (17.2)                |
| <b>Vitamin E (μg/dL)</b>                       | 1165.0 [916.3, 1534.2]     | 1157.9 [918.0, 1533.1]     | 1153.1 [918.3, 1525.3]     | 1183.1 [942.8, 1569.1]     |
| <b>Dietary fiber (g)<sup>2</sup></b>           | 14.31 [9.35, 21.30]        | 13.96 [9.20, 20.96]        | 13.61 [8.89, 20.30]        | 14.52 [9.40, 21.04]        |
| <b>Energy (kcal)<sup>2</sup></b>               | 1812.47 [1341.40, 2389.37] | 1929.65 [1431.36, 2554.75] | 1987.08 [1473.37, 2670.25] | 2188.35 [1617.25, 2907.63] |
| <b>Caffeine (mg)<sup>2</sup></b>               | 0.00 [0.00, 3.00]          | 59.20 [37.82, 78.00]       | 159.48 [128.11, 191.63]    | 365.83 [289.17, 520.30]    |

Abbreviations: gHb, glycated hemoglobin; MET, metabolic equivalent of task; PA, physical activity; Q, quartile.

<sup>1</sup>Continuous variables are expressed as mean (SD) or median [Q1, Q3]. Categorical variables are expressed as counts (%). In the left column, in parenthesis, the units of measure are reported.

Only some of the demographic, examination, lifestyle, laboratory, and dietary variables are included.

<sup>2</sup>The green color indicates the dietary variables, in order not to confuse them with the other variables.

**Supplementary Table 5. Characteristics of the whole population after stratification in quartiles of consumption of dietary fibres.<sup>1</sup>**

|                                                | Q1                         | Q2                         | Q3                         | Q4                         |
|------------------------------------------------|----------------------------|----------------------------|----------------------------|----------------------------|
| <i>n</i>                                       | 1774                       | 1774                       | 1774                       | 1774                       |
| <b>Telomere length (T/S ratio)</b>             | 1.04 (0.25)                | 1.03 (0.24)                | 1.02 (0.24)                | 1.02 (0.24)                |
| <b>NHANES cycle (%)</b>                        |                            |                            |                            |                            |
| 1999-2000                                      | 861 (48.5)                 | 795 (44.8)                 | 805 (45.4)                 | 787 (44.4)                 |
| 2001-2002                                      | 913 (51.5)                 | 979 (55.2)                 | 969 (54.6)                 | 987 (55.6)                 |
| <b>Sex (%)</b>                                 |                            |                            |                            |                            |
| Female                                         | 681 (38.4)                 | 754 (42.5)                 | 863 (48.6)                 | 1100 (62.0)                |
| Male                                           | 1093 (61.6)                | 1020 (57.5)                | 911 (51.4)                 | 674 (38.0)                 |
| <b>Age (years)</b>                             | 47 (18)                    | 49 (18)                    | 49 (18)                    | 49 (18)                    |
| <b>BMI (kg/m<sup>2</sup>)</b>                  | 28.91 (6.70)               | 28.65 (6.34)               | 28.36 (6.03)               | 27.84 (5.64)               |
| <b>Waist circumference (cm)</b>                | 97.4 (15.8)                | 97.0 (15.3)                | 97.4 (15.1)                | 97.0 (14.5)                |
| <b>Active smoking ((cigarettes/day)*years)</b> | 0 [0, 6]                   | 0 [0, 0]                   | 0 [0, 0]                   | 0 [0, 0]                   |
| <b>Passive smoking (cigarettes/day)</b>        | 0 [0, 4]                   | 0 [0, 0]                   | 0 [0, 0]                   | 0 [0, 0]                   |
| <b>PA level (%)</b>                            |                            |                            |                            |                            |
| 1                                              | 485 (27.4)                 | 453 (25.6)                 | 403 (22.7)                 | 366 (20.7)                 |
| 2                                              | 923 (52.1)                 | 933 (52.7)                 | 961 (54.2)                 | 949 (53.6)                 |
| 3                                              | 250 (14.1)                 | 288 (16.3)                 | 294 (16.6)                 | 311 (17.6)                 |
| 4                                              | 115 (6.5)                  | 98 (5.5)                   | 114 (6.4)                  | 146 (8.2)                  |
| <b>PA MET (MET*minutes*frequency)</b>          | 0 [0, 315]                 | 48 [0, 408]                | 96 [0, 472]                | 112 [0, 591]               |
| <b>Total cholesterol (mg/dL)</b>               | 204 (41)                   | 205 (43)                   | 205 (44)                   | 204 (41)                   |
| <b>HDL (mg/dL)</b>                             | 52 (16)                    | 52 (16)                    | 52 (15)                    | 51 (15)                    |
| <b>C-reactive protein (mg/dL)</b>              | 0.28 [0.11, 0.64]          | 0.25 [0.10, 0.56]          | 0.24 [0.10, 0.53]          | 0.19 [0.08, 0.41]          |
| <b>gHb (%)</b>                                 | 5.3 [5.1, 5.6]             | 5.3 [5.1, 5.7]             | 5.3 [5.1, 5.6]             | 5.3 [5.1, 5.6]             |
| <b>Cotinine (ng/mL)</b>                        | 0.32 [0.04, 130.00]        | 0.09 [0.04, 27.19]         | 0.06 [0.04, 1.27]          | 0.04 [0.04, 0.40]          |
| <b><i>γ</i>-tocopherol (μg/dL)</b>             | 240.0 [167.8, 328.8]       | 226.0 [148.2, 314.0]       | 212.2 [137.0, 294.9]       | 193.2 [121.4, 285.0]       |
| <b>Vitamin A (μg/dL)</b>                       | 56.4 (18.7)                | 58.4 (18.2)                | 59.6 (18.0)                | 60.4 (17.6)                |
| <b>Vitamin E (μg/dL)</b>                       | 1069.4 [875.6, 1378.3]     | 1167.7 [922.2, 1550.1]     | 1201.9 [944.9, 1611.6]     | 1240.2 [969.3, 1632.1]     |
| <b>Dietary fiber (g)<sup>2</sup></b>           | 6.50 [4.80, 7.91]          | 11.60 [10.34, 12.85]       | 17.00 [15.50, 18.70]       | 27.20 [23.66, 33.60]       |
| <b>Energy (kcal)<sup>2</sup></b>               | 1436.50 [1097.25, 1868.56] | 1825.55 [1424.17, 2404.00] | 2141.00 [1657.22, 2698.24] | 2617.59 [2040.50, 3354.81] |
| <b>Caffeine (mg)<sup>2</sup></b>               | 106.05 [14.00, 223.80]     | 103.00 [15.48, 227.57]     | 105.28 [11.88, 251.00]     | 99.29 [9.07, 236.75]       |

Abbreviations: gHb, glycated hemoglobin; MET, metabolic equivalent of task; PA, physical activity; Q, quartile.

<sup>1</sup>Continuous variables are expressed as mean (SD) or median [Q1, Q3]. Categorical variables are expressed as counts (%). In the left column, in parenthesis, the units of measure are reported.

Only some of the demographic, examination, lifestyle, laboratory, and dietary variables are included.

<sup>2</sup>The green color indicates the dietary variables, in order not to confuse them with the other variables.

**Supplementary Table 6. Characteristics of the whole population after stratification in quartiles of serum  $\gamma$ -tocopherol levels.<sup>1</sup>**

|                                                              | Q1                         | Q2                         | Q3                         | Q4                         |
|--------------------------------------------------------------|----------------------------|----------------------------|----------------------------|----------------------------|
| <i>n</i>                                                     | 1660                       | 1660                       | 1660                       | 1659                       |
| <b>Telomere length (T/S ratio)</b>                           | 1.03 (0.25)                | 1.05 (0.25)                | 1.04 (0.24)                | 1.00 (0.23)                |
| <b>NHANES cycle (%)</b>                                      |                            |                            |                            |                            |
| 1999-2000                                                    | 683 (41.1)                 | 700 (42.2)                 | 701 (42.2)                 | 733 (44.2)                 |
| 2001-2002                                                    | 977 (58.9)                 | 960 (57.8)                 | 959 (57.8)                 | 926 (55.8)                 |
| <b>Sex (%)</b>                                               |                            |                            |                            |                            |
| Female                                                       | 790 (47.6)                 | 793 (47.8)                 | 793 (47.8)                 | 806 (48.6)                 |
| Male                                                         | 870 (52.4)                 | 867 (52.2)                 | 867 (52.2)                 | 853 (51.4)                 |
| <b>Age (years)</b>                                           | 52 (19)                    | 46 (18)                    | 45 (17)                    | 50 (17)                    |
| <b>BMI (kg/m<sup>2</sup>)</b>                                | 26.59 (5.20)               | 27.46 (5.57)               | 28.88 (6.48)               | 30.90 (6.79)               |
| <b>Waist circumference (cm)</b>                              | 92.9 (14.3)                | 94.6 (14.3)                | 97.8 (15.1)                | 103.5 (15.3)               |
| <b>Active smoking ((cigarettes/day)*years)</b>               | 0 [0, 0]                   | 0 [0, 0]                   | 0 [0, 0]                   | 0 [0, 0]                   |
| <b>Passive smoking (cigarettes/day)</b>                      | 0 [0, 0]                   | 0 [0, 0]                   | 0 [0, 0]                   | 0 [0, 0]                   |
| <b>PA level (%)</b>                                          |                            |                            |                            |                            |
| 1                                                            | 374 (22.6)                 | 380 (22.9)                 | 390 (23.5)                 | 457 (27.6)                 |
| 2                                                            | 917 (55.4)                 | 887 (53.5)                 | 863 (52.0)                 | 842 (50.8)                 |
| 3                                                            | 286 (17.3)                 | 271 (16.3)                 | 291 (17.5)                 | 229 (13.8)                 |
| 4                                                            | 79 (4.8)                   | 120 (7.2)                  | 116 (7.0)                  | 130 (7.8)                  |
| <b>PA MET (MET*minutes*frequency)</b>                        | 158 [0, 630]               | 63 [0, 441]                | 60 [0, 408]                | 0 [0, 315]                 |
| <b>Total cholesterol (mg/dL)</b>                             | 194 (40)                   | 196 (39)                   | 204 (38)                   | 223 (44)                   |
| <b>HDL (mg/dL)</b>                                           | 54 (16)                    | 52 (15)                    | 51 (15)                    | 49 (16)                    |
| <b>C-reactive protein (mg/dL)</b>                            | 0.19 [0.07, 0.43]          | 0.22 [0.09, 0.50]          | 0.24 [0.09, 0.52]          | 0.32 [0.16, 0.70]          |
| <b>gHb (%)</b>                                               | 5.3 [5.1, 5.5]             | 5.3 [5.1, 5.6]             | 5.3 [5.1, 5.6]             | 5.5 [5.2, 5.9]             |
| <b>Cotinine (ng/mL)</b>                                      | 0.04 [0.03, 0.40]          | 0.08 [0.04, 34.09]         | 0.14 [0.04, 37.68]         | 0.15 [0.04, 51.48]         |
| <b><math>\gamma</math>-tocopherol (<math>\mu</math>g/dL)</b> | 96.7 [69.0, 121.0]         | 182.0 [163.0, 199.4]       | 259.0 [238.0, 281.8]       | 378.0 [337.0, 456.0]       |
| <b>Vitamin A (<math>\mu</math>g/dL)</b>                      | 62.2 (17.7)                | 57.9 (17.8)                | 57.0 (18.7)                | 57.9 (18.7)                |
| <b>Vitamin E (<math>\mu</math>g/dL)</b>                      | 1500.1 [1031.7, 2160.7]    | 1088.2 [868.4, 1415.0]     | 1056.5 [887.0, 1312.9]     | 1162.1 [953.6, 1451.6]     |
| <b>Dietary fiber (g)<sup>2</sup></b>                         | 15.73 [10.70, 23.40]       | 14.33 [9.20, 21.30]        | 13.40 [8.72, 19.41]        | 12.65 [8.23, 18.88]        |
| <b>Energy (kcal)<sup>2</sup></b>                             | 1911.00 [1443.50, 2512.75] | 1990.80 [1462.70, 2645.50] | 2038.34 [1506.42, 2767.90] | 1965.00 [1445.50, 2669.01] |
| <b>Caffeine (mg)<sup>2</sup></b>                             | 91.00 [7.00, 250.08]       | 93.00 [9.28, 208.49]       | 100.00 [10.00, 223.40]     | 124.00 [36.90, 261.88]     |

Abbreviations: gHb, glycated hemoglobin; MET, metabolic equivalent of task; PA, physical activity; Q, quartile.

<sup>1</sup>Continuous variables are expressed as mean (SD) or median [Q1, Q3]. Categorical variables are expressed as counts (%). In the left column, in parenthesis, the units of measure are reported.

Only some of the demographic, examination, lifestyle, laboratory, and dietary variables are included.

<sup>2</sup>The green color indicates the dietary variables, in order not to confuse them with the other variables.
